# Supplementary material
Source: publisher figshare collection journal article supplement (https://tandf.figshare.com/ndownloader/files/36009807)
Supplement: Supplementary file 1 [file 36009807]

**Table S3 Different cis-acting elements present in the promoter regions of *PeqPKS*, *DcaPKS* and *AshPKS* genes identified using PlantCARE**

| **Gene Id** | **Plant growth and development** | **Phytohormone responsive** | **Abiotic and biotic Stress response** | **Light response** |
| --- | --- | --- | --- | --- |
| PeqPKS01 | RY-element | ABRE, AuxRR-core, CGTCA-motif, ERE, TGACG-motif | ARE, LTR, MBS, TC-rich repeats, WUN-motif | AT1-motif, Box 4, G-box, GT1-motif, I-box, L-box |
| PeqPKS02 |  | ABRE, CGTCA-motif, TGA-element | TC-rich repeats | Box 4, G-box, GT1-motif, MRE |
| PeqPKS03 | GCN4_motif, MSA-like, circadian | ABRE, TGA-element | ARE, LTR, MBS, DRE core | AT1-motif, G-box, MRE, G-Box, GATA-motif, chs-CMA2a |
| PeqPKS04 |  | ABRE, CGTCA-motif, TGA-element, TGACG-motif, TCA-element | ARE, LTR, MBS, TC-rich repeats, WUN-motif, DRE core | Box 4, G-box, TCCC-motif, G-Box, GATA-motif, chs-CMA2a |
| PeqPKS05 | GCN4_motif, Box III | ABRE, CGTCA-motif, ERE, TGA-element, TGACG-motif | TC-rich repeats, WUN-motif | Box 4, G-box, MRE, G-Box, TCT-motif |
| DcaPKS01 |  | ABRE, TGA-element, TGACG-motif | ARE, MBSI | Box 4, G-box, GT1-motif, MRE, G-Box, GATA-motif, AE-box |
| DcaPKS02 | CCAAT-box | ABRE, CGTCA-motif, ERE,TGA-element, TGACG-motif, TATC-box | ARE, MBS, TC-rich repeats | G-box, GT1-motif, G-Box, GATA-motif, ATC-motif |
| DcaPKS03 |  | ABRE, CGTCA-motif, ERE, TGA-element, TGACG-motif | ARE, WUN-motif, DRE | G-box, G-Box, GATA-motif, TCT-motif, LAMP-element |
| DcaPKS04 | CCAAT-box, O2-site | ABRE, CGTCA-motif, TGA-element,TGACG-motif | ARE, MBS, DRE core | Box 4, TCCC-motif, G-Box |
| DcaPKS05 |  | TGA-element | ARE, LTR, MBS, TC-rich repeats | GT1-motif, I-box, MRE, TCT-motif, LAMP-element |
| DcaPKS06 | CCAAT-box | ABRE, CGTCA-motif, ERE, TCA-element | MBS, TC-rich repeats | Box 4, G-box, G-Box, TCT-motif, AAAC-motif |
| DcaPKS07 |  | ABRE, CGTCA-motif | ARE, MBS, DRE core, GC-motif | Box 4, GT1-motif, TCCC-motif,G-Box, chs-CMA2a |
| DcaPKS08 |  | ABRE, CGTCA-motif | ARE, MBS, DRE core, GC-motif | Box 4, GT1-motif, TCCC-motif, G-Box, chs-CMA2a |
| AshPKS01 |  | ABRE, AuxRR-core, CGTCA-motif, ERE, GARE-motif, TGA-element, TGACG-motif | WUN-motif | Box II,CAG-motif, G-box, GT1-motif, TCCC-motif, G-Box, TCT-motif, AE-box, ATCT-motif |
| AshPKS02 | CCAAT-box | ABRE, CGTCA-motif, ERE, TGA-element, TGACG-motif | LTR, WUN-motif | Box 4, G-box, G-Box, TCT-motif |
| AshPKS03 | GCN4_motif | AuxRR-core, CGTCA-motif, ERE,P-box,TGACG-motif, TCA-element | ARE, LTR, WUN-motif | GATA-motif, Sp1 |
| AshPKS04 | CAT-box | ABRE, ERE, TCA-element | ARE, MBS, WUN-motif | AT1-motif, Box 4, G-box, GT1-motif, TCCC-motif, G-Box, GATA-motif, TCT-motif, chs-CMA1a |
| AshPKS05 | Circadian | CGTCA-motif, ERE | LTR, TC-rich repeats, GC-motif | Box 4, GT1-motif, TCCC-motif, TCT-motif, chs-CMA1a |
| AshPKS06 | CCAAT-box | ABRE, CGTCA-motif, ERE, TGACG-motif, TCA-element | ARE, LTR, WUN-motif | Box 4, G-box, GT1-motif, I-box, TCT-motif, chs-CMA1a, ATCT-motif, ACE |
